# Supplementary material
Source: HighWire-hosted journal article supplement (https://qualitysafety.bmj.com/content/28/5/374)
Supplement: inline-supplementary-material-1 [file inline-supplementary-material-1.pdf]

**Appendix 1: Outcomes in Individual Intervention and Comparison States for Hip Arthroplasty**

|                     |    | Pre-Intervention |           |      | Post-Intervention |           |      |
|---------------------|----|------------------|-----------|------|-------------------|-----------|------|
|                     |    | Procedures       | Infection | %    | Procedures        | Infection | %    |
| Intervention States | NY | 14,150           | 257       | 1.82 | 27,968            | 429       | 1.53 |
|                     | AR | 2,433            | 59        | 2.42 | 4,902             | 107       | 2.18 |
|                     | TN | 6,124            | 121       | 1.98 | 12,459            | 208       | 1.67 |
|                     | MI | 9,300            | 216       | 2.32 | 17,923            | 330       | 1.84 |
|                     | CO | 3,923            | 59        | 1.50 | 8,100             | 98        | 1.21 |
| Comparison States   | TX | 14,252           | 412       | 2.89 | 28,008            | 790       | 2.82 |
|                     | MO | 5,554            | 98        | 1.76 | 11,157            | 201       | 1.80 |
|                     | CT | 3,282            | 57        | 1.74 | 6,154             | 107       | 1.74 |
|                     | IL | 9,538            | 197       | 2.07 | 17,845            | 342       | 1.92 |
|                     | WA | 5,729            | 73        | 1.27 | 11,157            | 150       | 1.34 |

**Intervention State/Comparison State Pairs:**

1. New York (NY, intervention state) with Texas (TX, comparison state)
2. Arkansas (AR, intervention state) with Missouri (MO, comparison state)
3. Tennessee (TN, intervention state) with Connecticut (CT, comparison state)
4. Mississippi (MI, intervention state) with Illinois (IL, comparison state)
5. Colorado (CO, intervention state) with Washington (WA, comparison state)

**Appendix 2: Outcomes in Individual Intervention and Comparison States for Knee Arthroplasty**

|                     |    | Pre-Intervention |           |      | Post-Intervention |           |      |
|---------------------|----|------------------|-----------|------|-------------------|-----------|------|
|                     |    | Procedures       | Infection | %    | Procedures        | Infection | %    |
| Intervention States | NY | 16,615           | 321       | 1.93 | 32,408            | 467       | 1.44 |
|                     | AR | 4,104            | 56        | 1.36 | 7,782             | 88        | 1.13 |
|                     | TN | 8,789            | 121       | 1.38 | 17,910            | 174       | 0.97 |
|                     | MI | 14,516           | 248       | 1.71 | 26,706            | 411       | 1.54 |
|                     | CO | 6,087            | 81        | 1.33 | 11,750            | 117       | 1.00 |
| Comparison States   | TX | 24,481           | 486       | 1.99 | 44,113            | 786       | 1.78 |
|                     | MO | 8,902            | 101       | 1.13 | 17,219            | 207       | 1.20 |
|                     | CT | 3,842            | 50        | 1.30 | 7,099             | 88        | 1.24 |
|                     | IL | 14,103           | 238       | 1.69 | 26,329            | 349       | 1.33 |
|                     | WA | 7,354            | 85        | 1.16 | 13,932            | 147       | 1.06 |

**Intervention State/Comparison State Pairs:**

1. New York (NY, intervention state) with Texas (TX, comparison state)
2. Arkansas (AR, intervention state) with Missouri (MO, comparison state)
3. Tennessee (TN, intervention state) with Connecticut (CT, comparison state)
4. Mississippi (MI, intervention state) with Illinois (IL, comparison state)
5. Colorado (CO, intervention state) with Washington (WA, comparison state)
